# Supplementary material
Source: PubMed Central journal article supplement (PMC3663919)
Supplement: NIHMS436343-supplement-Supp_Material.pdf [file NIHMS436343-supplement-Supp_Material.pdf]

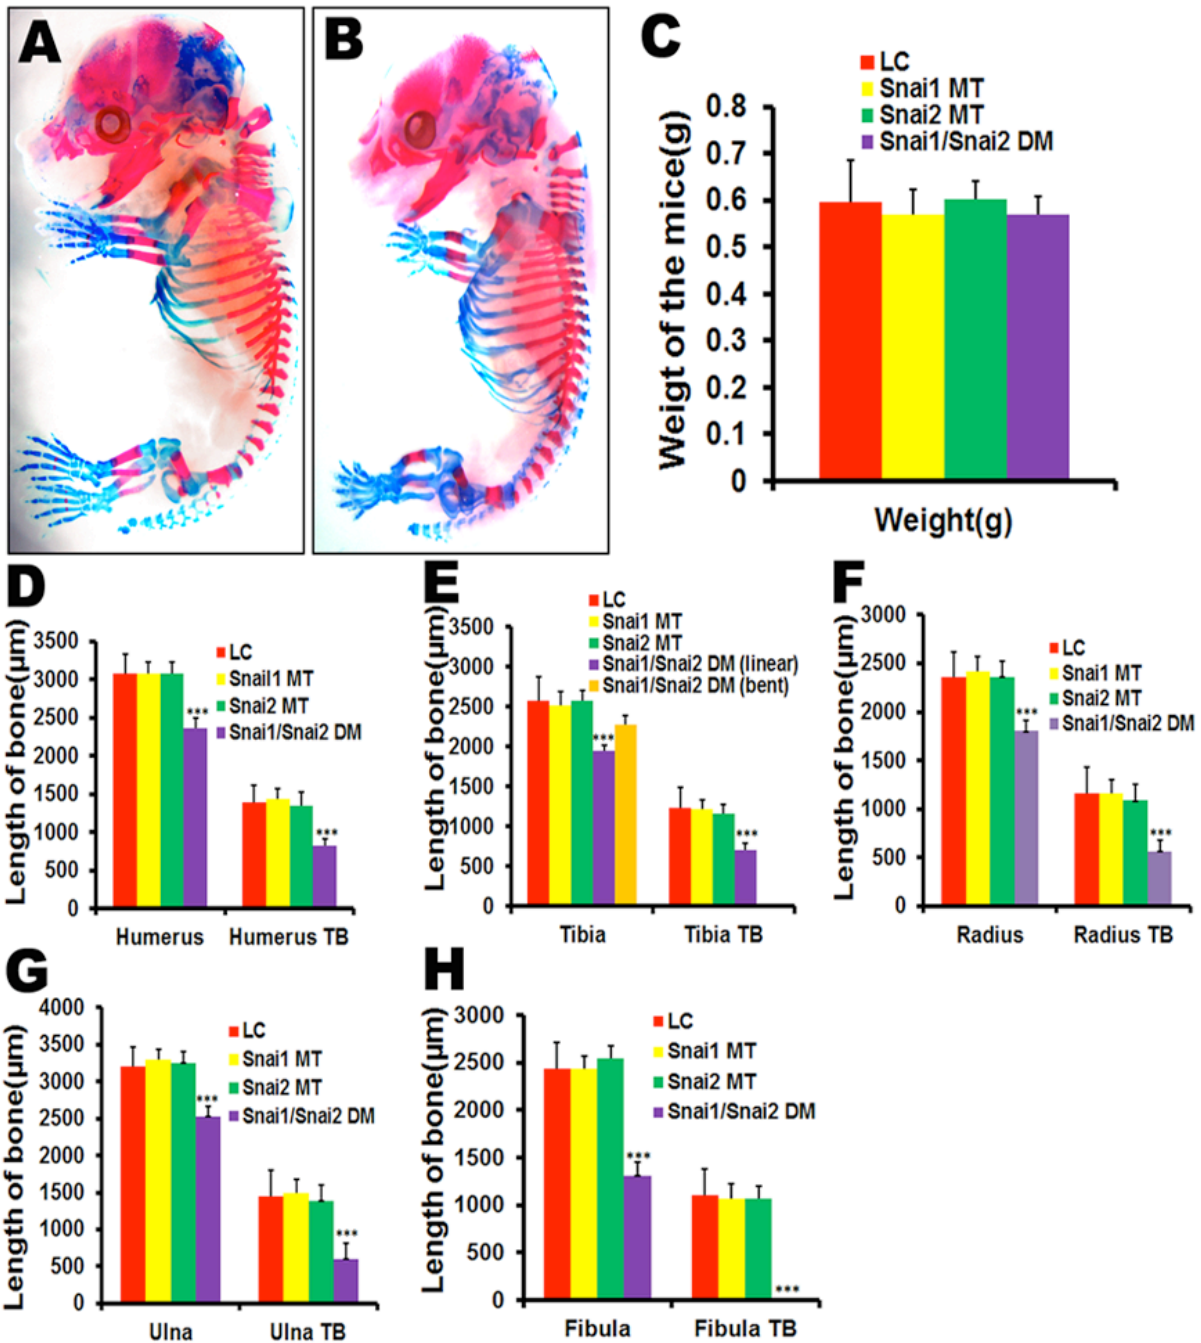

**Supplemental Figure S1.** (A, B) Alcian blue-Alizarin red staining of E16.5 control (A) and *Snai1/Snai2* (B) double mutant (DM) embryos. (C) No significant differences were observed in the weights of E16.5 embryos of the four different genotypes. (D-E) Length measurements of other fore- and hindlimb long bones, including humerus (D), tibia (E), radius (F), ulna (G), and fibula (H). All long bones, as well as their trabecular regions, were significantly shorter in *Snai1/Snai2* DM embryos than in the other genotypes. TB: trabecular bone.

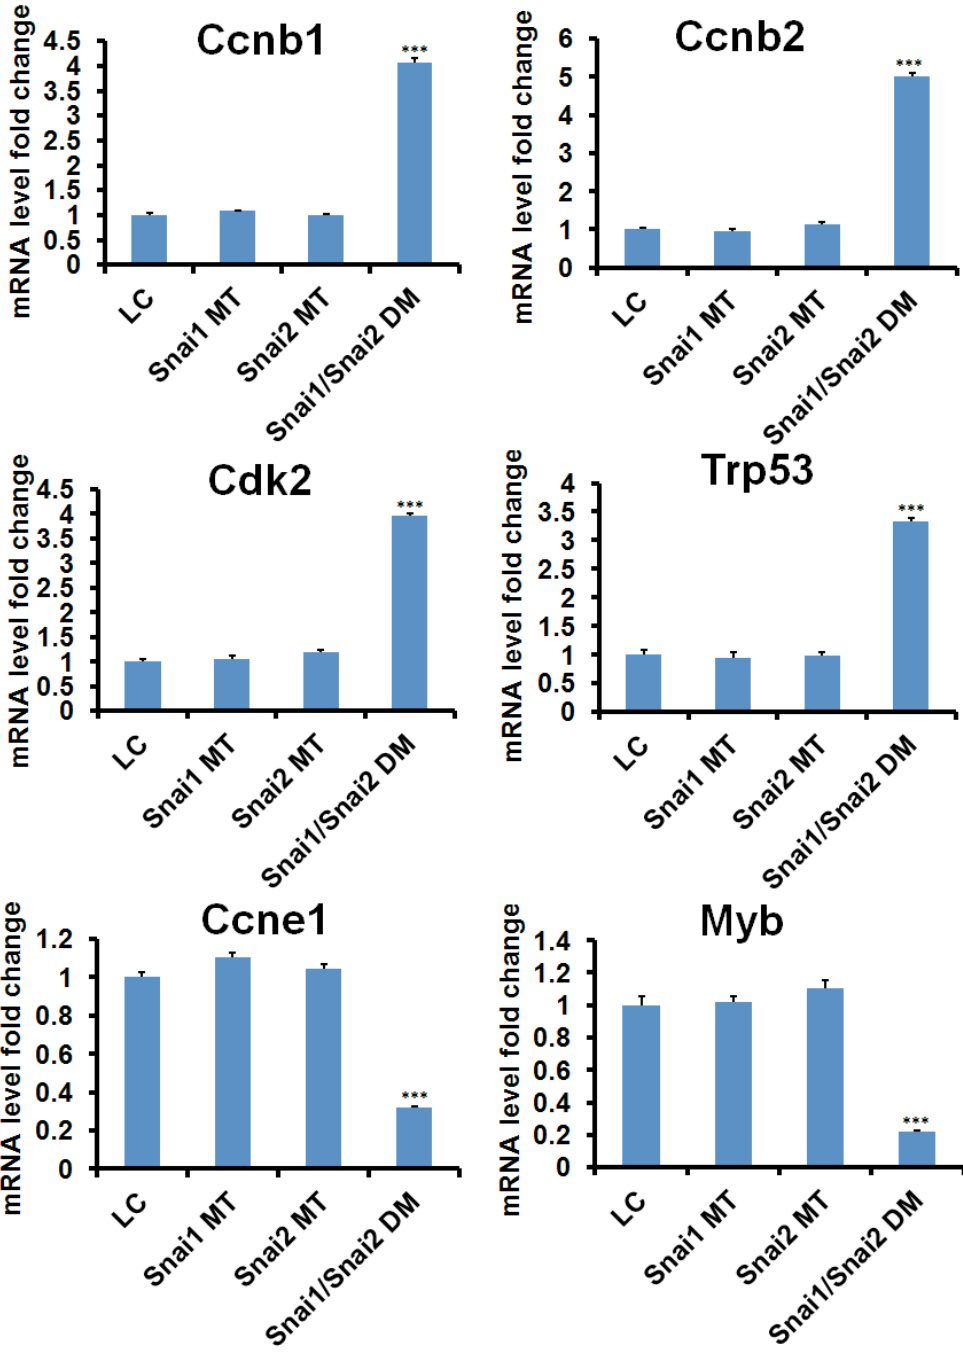

**Supplemental Figure S2.** Quantitative RT-PCR of cell cycle regulators in femurs at E16.5. mRNAs encoding *Ccnb1*, *Ccnb2*, *Cdk2*, and *Trp53* were significantly increased in *Snai1/Snai2* DM femurs compared to the other genotypes, whereas *Ccne1* and *Myb* mRNA levels were significantly decreased in DM femurs. \*\*\* p < 0.001.

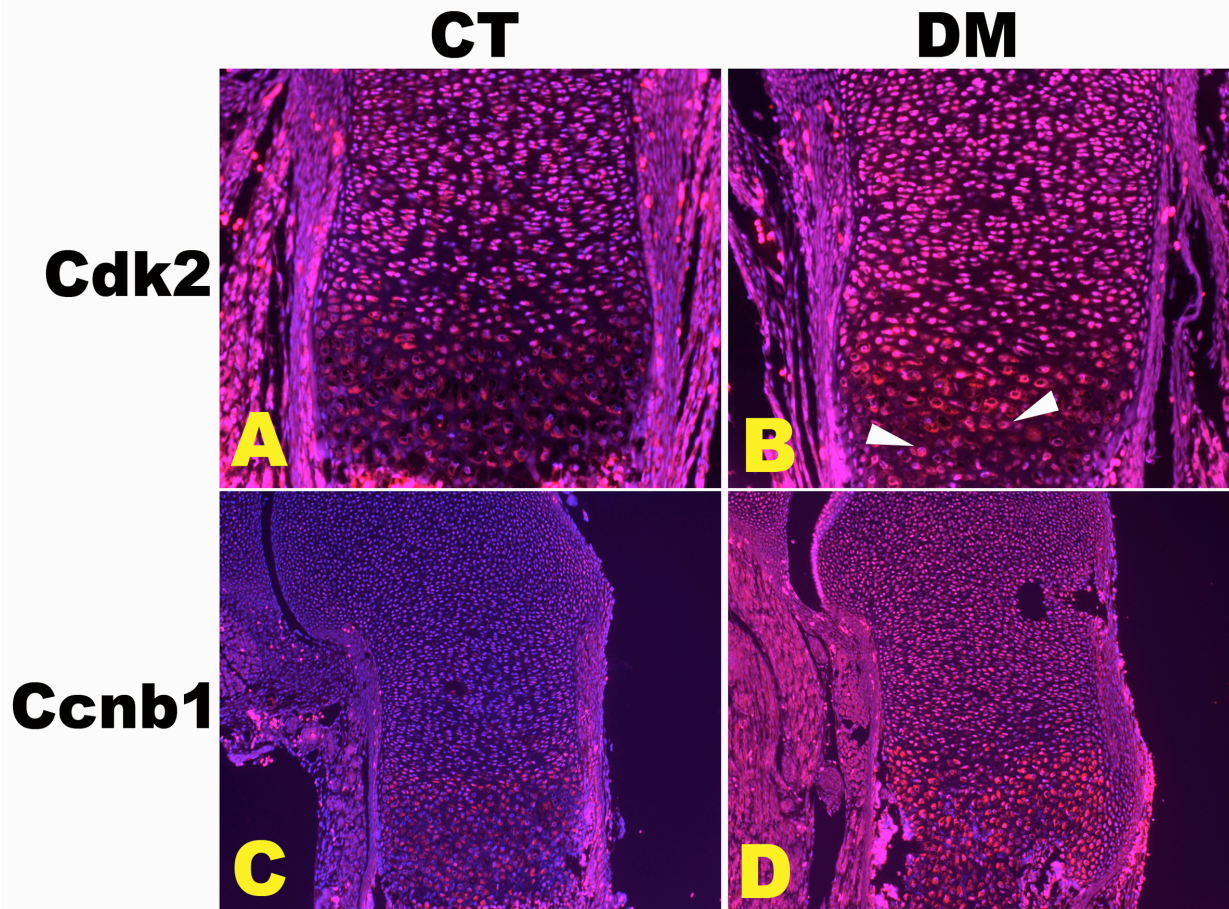

**Supplemental Figure S3.** Immunofluorescent staining with antibodies to the (A, B) cyclin dependent kinase 2 (Cdk2) and (C-D) cyclin B1 (Ccnb1) proteins revealed increased protein expression in DM femurs.

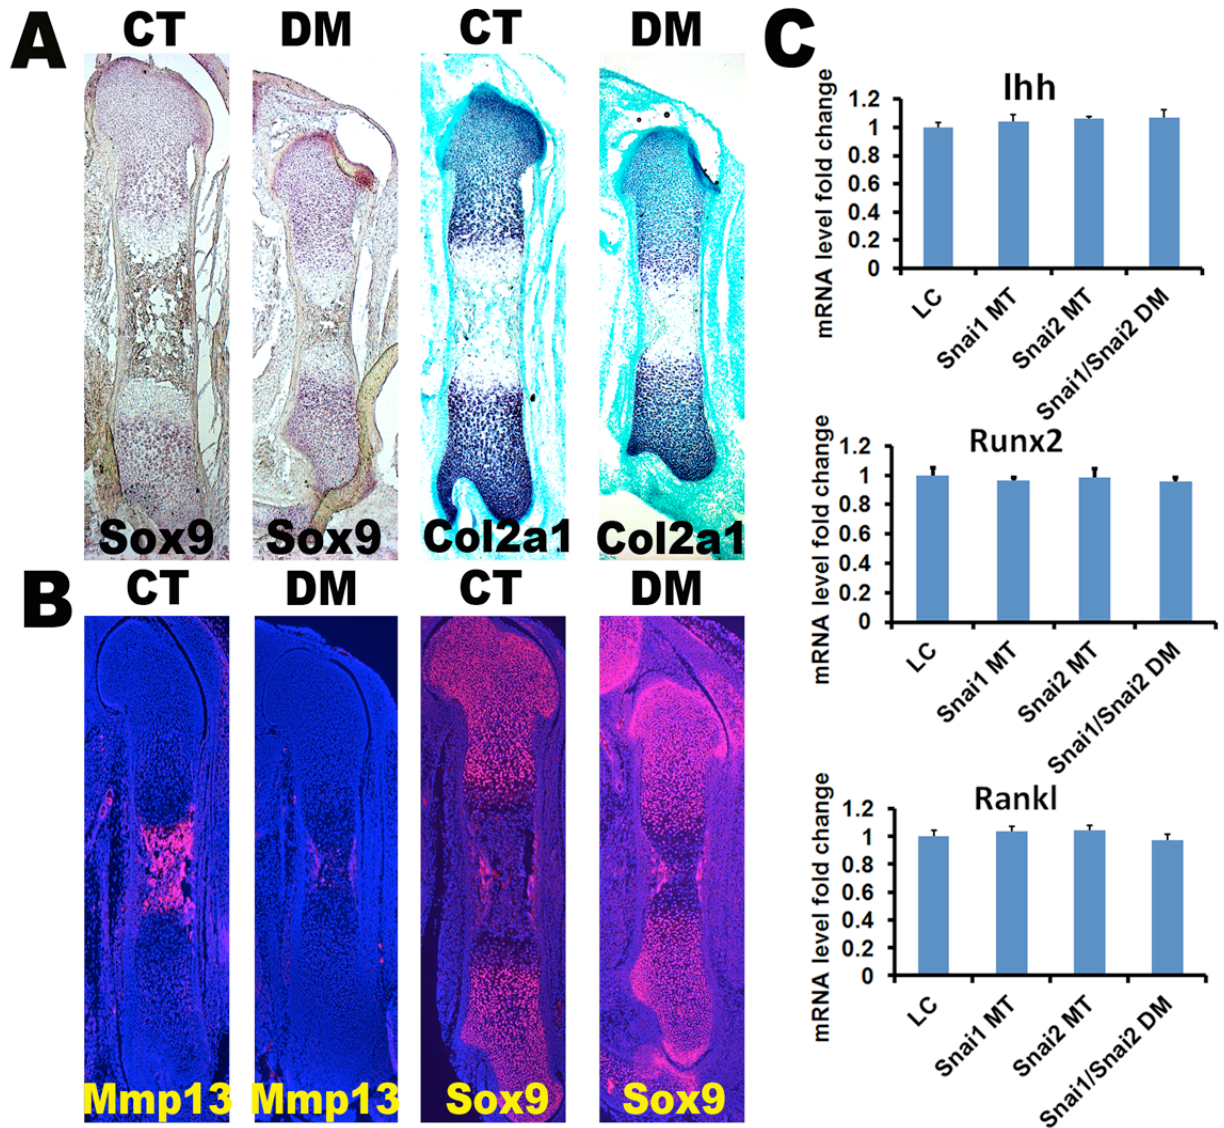

**Supplemental Figure S4.** (A) In situ hybridization of E16.5 femurs with probes to *Sox9* and *Col2a1* demonstrate no significant differences between their expression pattern in control (CT) and *Snai1/Snai2* double mutant (DM) femurs. (B) Analysis of protein expression by immunofluorescence confirmed the in situ hybridization results for Mmp13 and Sox9. (C) Quantitative RT-PCR demonstrated that transcript levels of *Ihh*, *Runx2*, and *Rankl* did not differ significantly in any of the genotype groups.

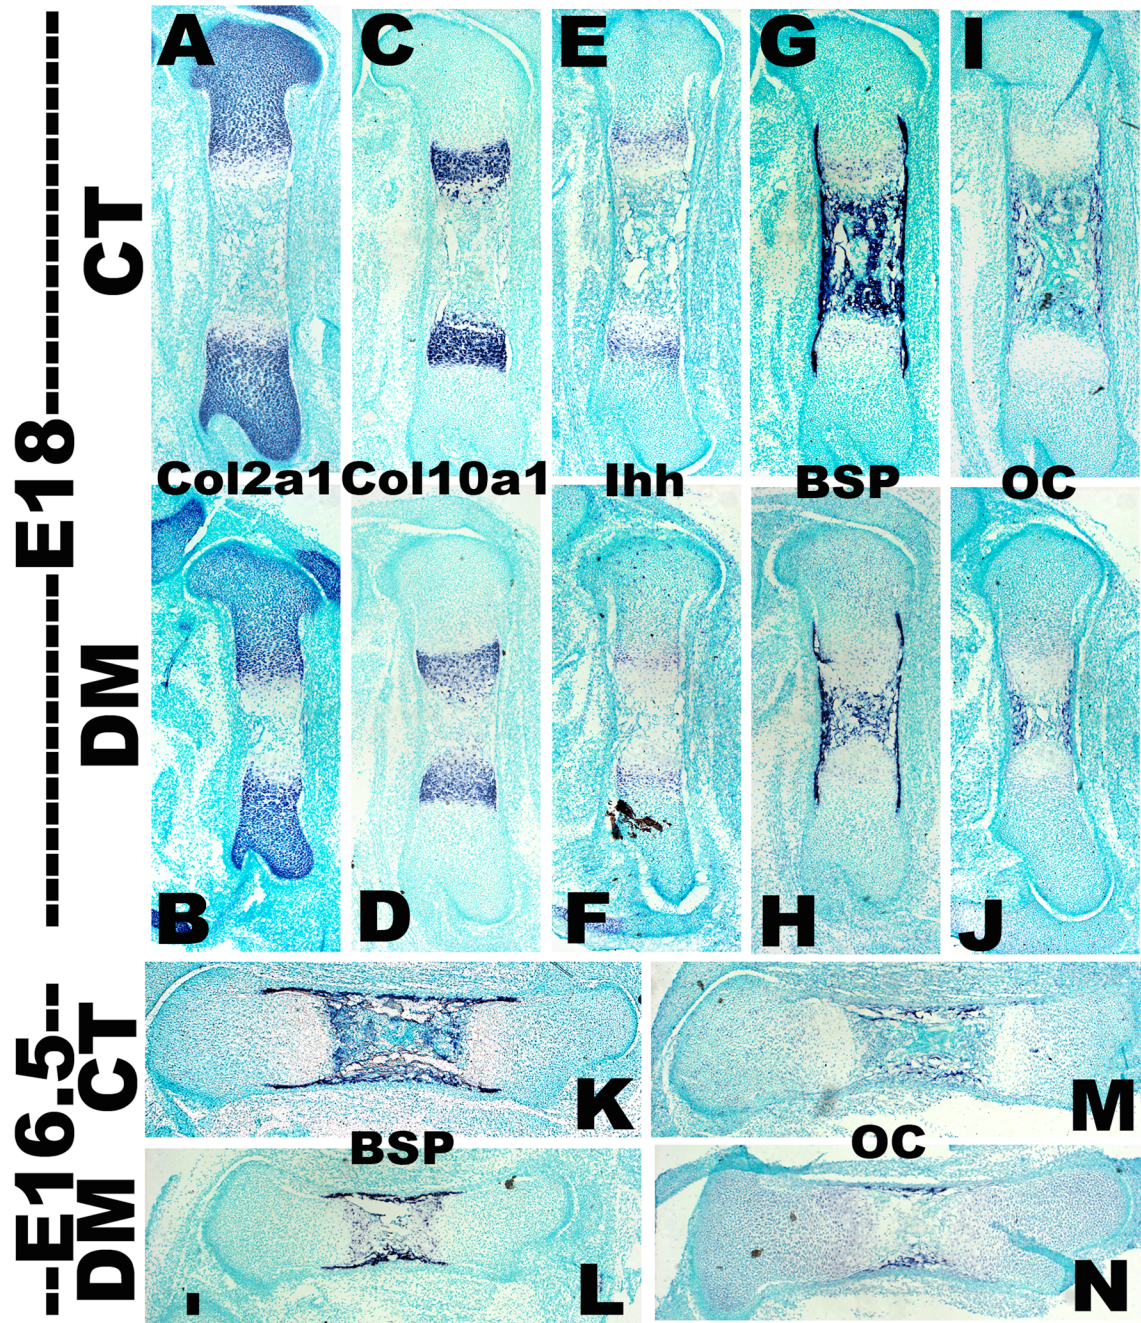

**Supplemental Figure S5.** Chondrocyte and osteoblast marker gene expression in *Snai1/Snai2* DM femurs. (A-J) E18 femurs. (K-N) E16.5 femurs. The DM femurs exhibited decreased expression of the osteoblast differentiation markers bone sialoprotein (BSP) and osteocalcin (OC), particularly at E16.5. However, the pattern of expression of both chondrocyte and osteoblast markers was unaltered in the DM femurs.

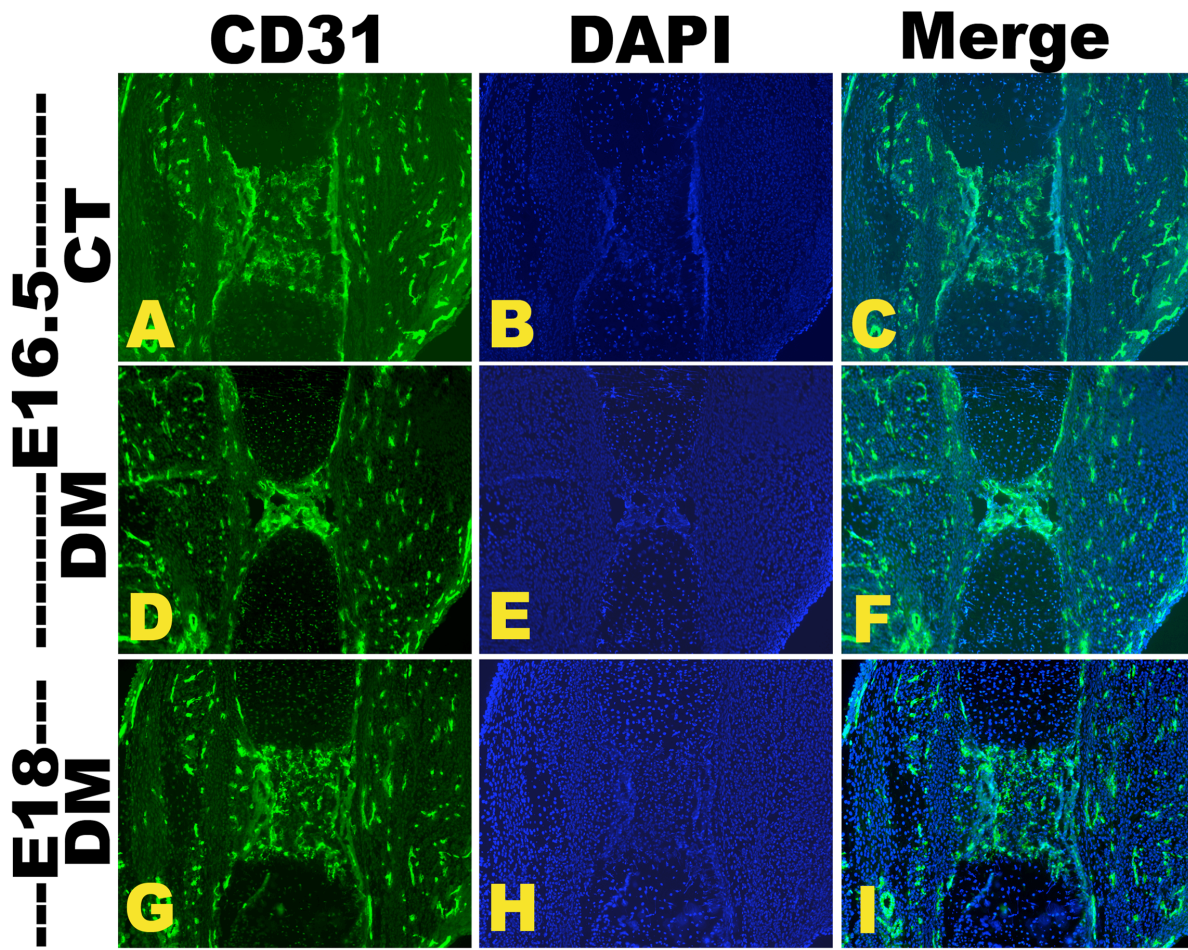

**Supplemental Figure S6.** Pecam1 (CD31) protein expression in control littermate (A-C) and *Snai1/Snai2* DM (D-I) femurs at E16.5 (A-F) and E18 (G-I). Blood vessels were observed growing into the region of trabecular bone formation in DM femurs at both time points.

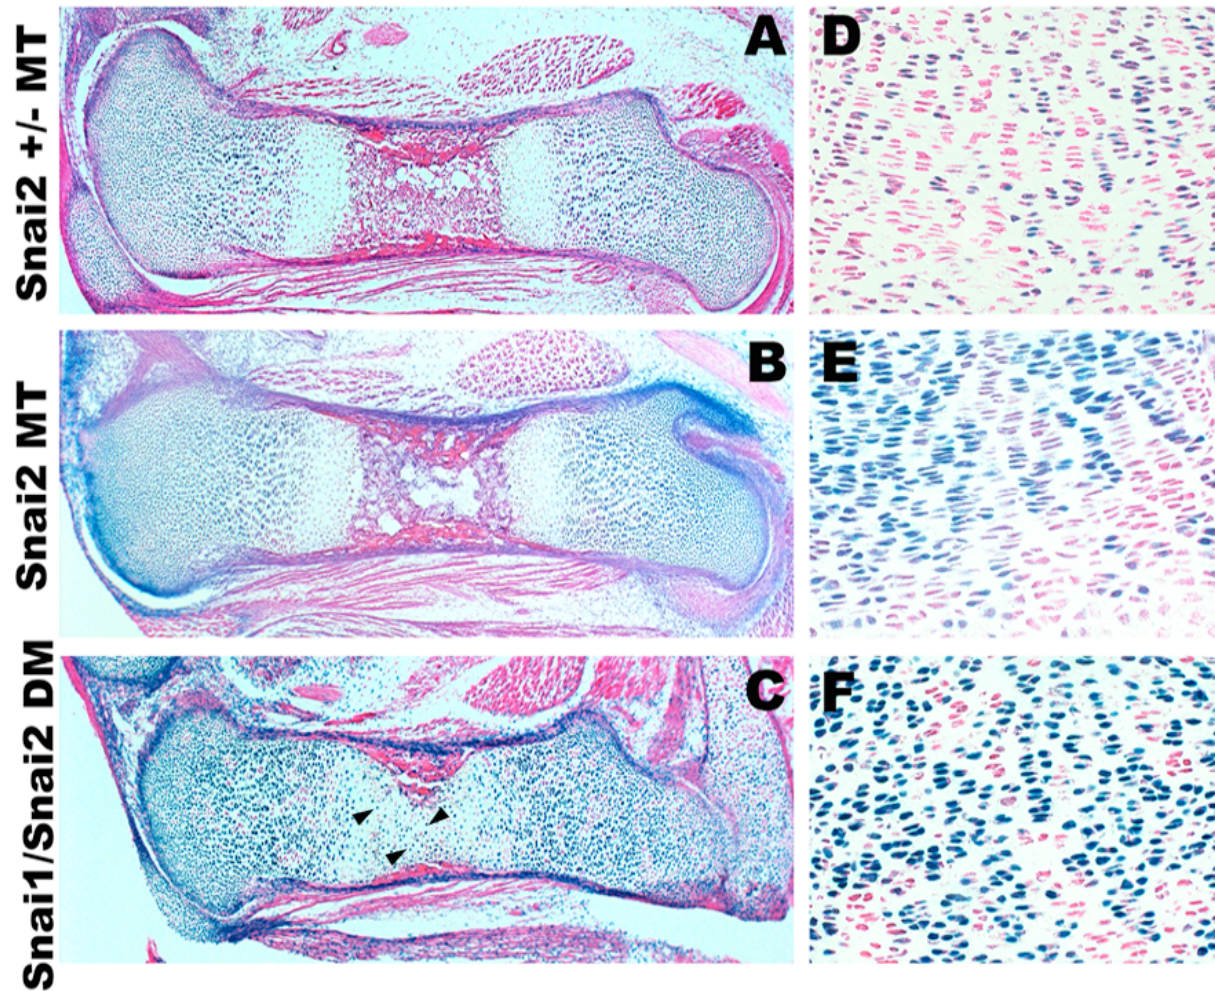

**Supplemental Figure S7.** (A-F) Femurs at E16.5 were analyzed for  $\beta$ -galactosidase expression from the *Snai2<sup>lacZ</sup>* null allele. In *Snai2<sup>+/-</sup>* heterozygotes (A, D),  $\beta$ -galactosidase expression was observed in proliferating chondrocytes in the growth plate. In *Snai2<sup>-/-</sup>* homozygotes (B, E), the expression pattern was not changed; however, compared to the *Snai2<sup>+/-</sup>* heterozygote,  $\beta$ -galactosidase expression was increased (compare A, D to B, E). In the *Snai1/Snai2* DM femur (C, F),  $\beta$ -galactosidase expression was again increased compared to both *Snai2<sup>lacZ</sup>* heterozygotes and homozygotes. In addition,  $\beta$ -galactosidase expression in *Snai1/Snai2* DM femurs was expanded to hypertrophic chondrocytes (arrowheads in C).

### Wild type growth plate

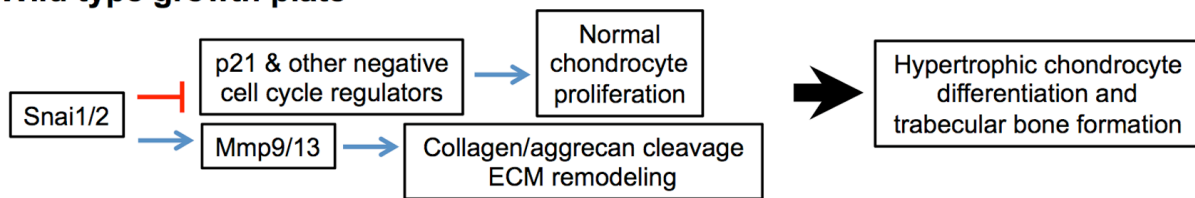

### Snai1/2 mutant growth plate

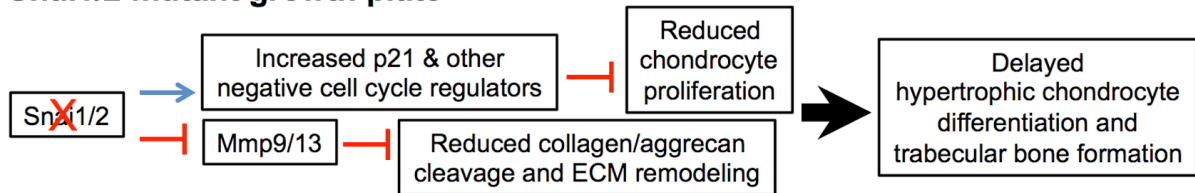

**Supplemental Figure S8.** Model for *Snai1/Snai2* function in the growth plate. We propose that a major function of the SNAI1 and SNAI2 proteins in the growth plate is to cooperatively repress transcription of the *Cdkn1a* gene (encoding the p21<sup>Waf1/Cip1</sup> protein) and other negative cell cycle regulators. Either directly or indirectly, the SNAI1 and SNAI2 proteins also promote transcription of the *Mmp9* and *Mmp13* genes. The consequence of loss of both SNAI1 and SNAI2 function in the growth plate is reduced chondrocyte cell proliferation and delayed hypertrophic chondrocyte differentiation and trabecular bone formation.



**Supplementary Table 1. qRT-PCR primers**

| Gene           | Forward                 | Reverse                 | Product size |
|----------------|-------------------------|-------------------------|--------------|
| <i>Actb</i>    | GGCTGTATTCCCCTCCATCG    | CCAGTTGGTAACAATGCCATGT  | 154 bp       |
| <i>Snai1</i>   | CTTGTGTCTGCACGACCTGT    | CTTCACATCCGAGTGGGTTT    | 167 bp       |
| <i>Snai2</i>   | GGCTGCTTCAAGGACACATT    | TTGGAGCAGTTTTTGCCTG     | 151 bp       |
| <i>Col1a1</i>  | CTGGCGGTTCCAGTCCAAT     | TTCCAGGCAATCCACGAGC     | 141 bp       |
| <i>Col2a1</i>  | CAGGATGCCCGAAAATTAGGG   | ACCACGATCACCTCTGGGT     | 132 bp       |
| <i>Col10a1</i> | TTCTGCTGCTAATGTTCTTGACC | GGGATGAAGTATTGTGTCTTGGG | 115 bp       |
| <i>Sox9</i>    | AGTACCCGCATCTGCACAAC    | TACTTGTAAATCGGGGTGGTCT  | 145 bp       |
| <i>Acan</i>    | TTGGAGATCCAGAACCTTCG    | TGTGCTCGATCAAAGTCCAG    | 164 bp       |
| <i>Mmp9</i>    | CTGGACAGCCAGACACTAAAG   | CTCGCGCAAGTCTTCAGAG     | 145 bp       |
| <i>Mmp13</i>   | ACCTCCACAGTTGACAGGCT    | AGGCACTCCACATCTTGGTTT   | 114 bp       |
| <i>Ihh</i>     | CTCTTGCTACAAGCAGTTCA    | CCGTGTTCTCCTCGTCCTT     | 156 bp       |
| <i>Cdkn1a</i>  | CGAGAACGGTGGAACCTTTGAC  | CAGGGCTCAGGTAGACCTTG    | 106 bp       |
| <i>Ccnb1</i>   | GCGTGTGCCTGTGACAGTTA    | CCTAGCGTTTTTGCTTCCCTT   | 135 bp       |
| <i>Ccnb2</i>   | GCCAAGAGCCATGTGACTATC   | CAGAGCTGGTACTTTGGTGTTT  | 114 bp       |
| <i>Cdk2</i>    | CTCTCACGGGCATTCTCTTC    | CCCTCTGCATTGATAAGCAGG   | 133 bp       |
| <i>Ccne1</i>   | GTGGCTCCGACCTTTCAGTC    | CACAGTCTTGCAATCTTGGA    | 101 bp       |
| <i>Myb</i>     | AGACCCCGACACAGCATCTA    | CAGCAGCCCATCGTAGTCAT    | 81 bp        |
| <i>Trp53</i>   | GCGTAAACGCTTCGAGATGTT   | TTTTTATGGCGGGAAGTAGACTG | 144 bp       |
